# Supplementary material for: Combined Targeting of Pathogenetic Mechanisms in Pancreatic Neuroendocrine Tumors Elicits Synergistic Antitumor Effects
Source: MDPI journal article supplement (doi:10.3390/cancers14225481), 2022-11-08
Supplement: s1 [file s1]

## Supplementary Tables

**Supplementary Table S1: List of TaqMan gene expression assays used for qPCR**

| Assay ID      | Gene name | Dye     | Species |
|---------------|-----------|---------|---------|
| Hs00187842_m1 | B2M       | FAM-MGB | human   |
| Hs00171105_m1 | ccna1     | FAM-MGB | human   |
| Hs00427214_g1 | pcna      | FAM-MGB | human   |
| Rn00560865_m1 | B2M       | FAM-MGB | rat     |
| Rn01761348_m1 | ccna1     | FAM-MGB | rat     |
| Rn01514538_g1 | pcna      | FAM-MGB | rat     |

**Supplementary Table S2: List of antibodies used for Western blotting**

| Type             | Antibody                                                                                     | Clonality  | Company                   | ID      | Dilution |
|------------------|----------------------------------------------------------------------------------------------|------------|---------------------------|---------|----------|
| Primary          | Akt Antibody                                                                                 | Rabbit     | Cell Signaling Technology | 9272    | 1/1000   |
| Primary          | Phospho-Akt (Ser473) (D9E) XP®                                                               | Rabbit     | Cell Signaling Technology | 4060    | 1/2000   |
| Primary          | Rb (4H1) Mouse mAb                                                                           | Mouse      | Cell Signaling Technology | 9309    | 1/2000   |
| Primary          | Phospho-Rb (Ser807/811) Antibody                                                             | Rabbit     | Cell Signaling Technology | 9308    | 1/1000   |
| Primary HRP      | $\alpha$ -Tubulin (DM1A) Mouse mAb (HRP Conjugate)                                           | Mouse      | Cell Signaling Technology | 12351   | 1/5000   |
| Primary insulin  | Insulin polyclonal                                                                           | Guinea pig | Dako                      | A0564   | 1/750    |
| Primary glucagon | Glucagon polyclonal                                                                          | Rabbit     | Dako                      | A0565   | 1/1500   |
| Secondary        | Rabbit IgG HRP Linked Whole Ab                                                               |            | GE Healthcare             | NA934 V | 1/2000   |
| Secondary        | F(ab') <sub>2</sub> -Goat anti-Mouse IgG (H+L) Highly Cross-Adsorbed Secondary Antibody, HRP |            | Invitrogen                | A24518  | 1/2000   |
| Secondary IF*    | Rabbit IgG [H+L] fluorescein isothiocyanate-conjugated                                       |            | Invitrogen                | F-2765  | 1/200    |
| Secondary IF*    | Guinea pig IgG [H+L] Alexa Fluor 555-conjugated                                              |            | Invitrogen                | A-21453 | 1/200    |

\*immunofluorescence

**Supplementary Table S3: Clinico-pathological features of the patients from whom PanNEN tissues were obtained at surgery to establish primary cultures.**

| Patient | Sex    | Age | Location            | Ki-67 | T  | N  | M  |
|---------|--------|-----|---------------------|-------|----|----|----|
| PNET1   | Female | 55  | Pancreas<br>primary | 2.5%  | T2 | N0 | M0 |
| PNET2   | Female | 29  | Pancreas<br>primary | 4.0%  | T2 | N0 | M0 |
| PNET3   | Male   | 65  | Liver<br>metastasis | 15%   | Tx | Nx | M1 |
| PNET4   | Female | 37  | Liver<br>metastasis | 10%   | Tx | Nx | M1 |

## Supplementary Figures

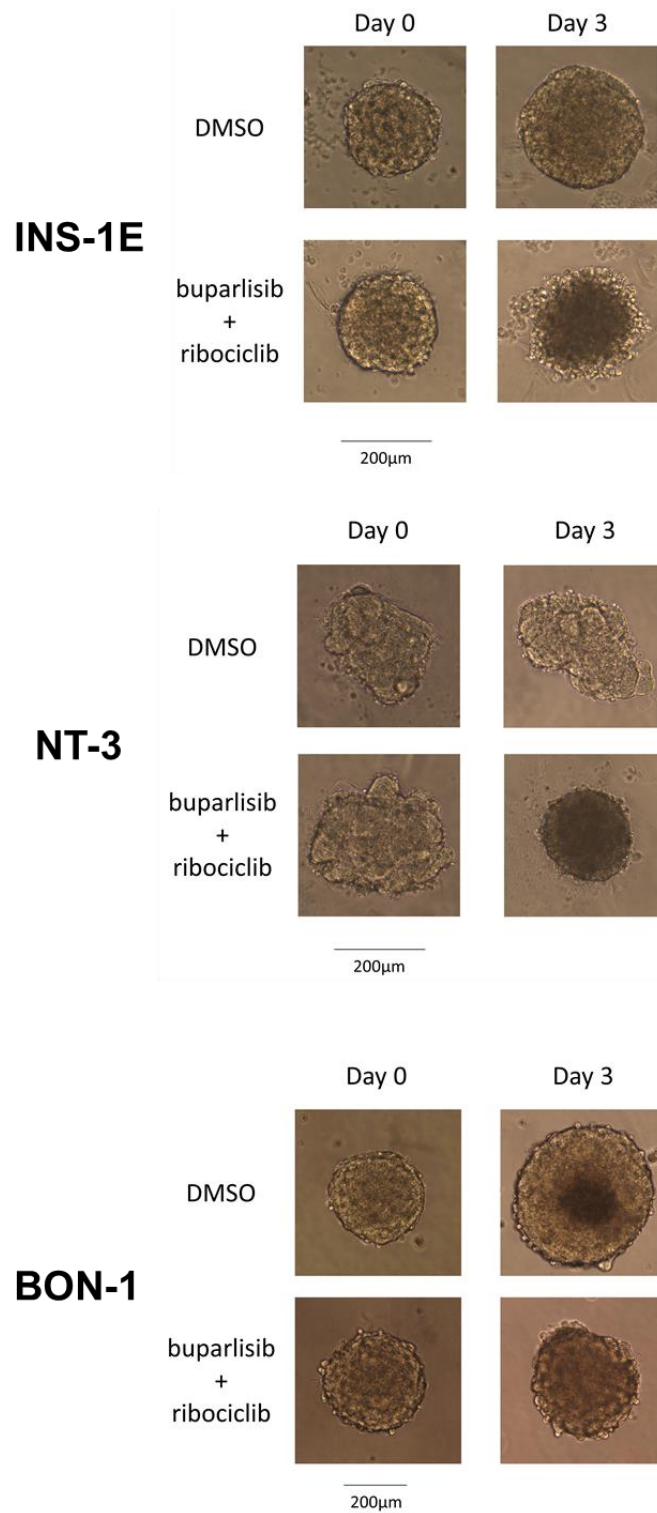

**Supplementary Figure S1. Effect of the combination buparlisib and ribociclib on 3D spheroid cultures of the PanNET cell lines.** INS-1, NT-3 and BON-1 cells were plated in ultra-low attachment plates and 3-5 days later (Day 0) they were treated with DMSO vehicle or with the combination buparlisib and ribociclib for 3 days. Pictures of representative spheroids were taken at Day 0 and Day 3 under the light microscope maintaining the same magnification.

A

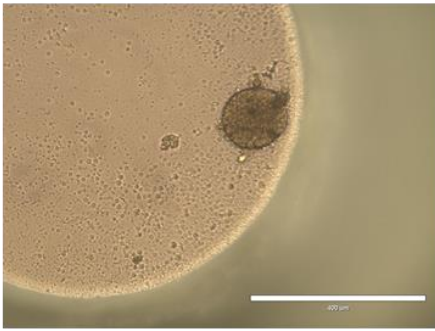

B

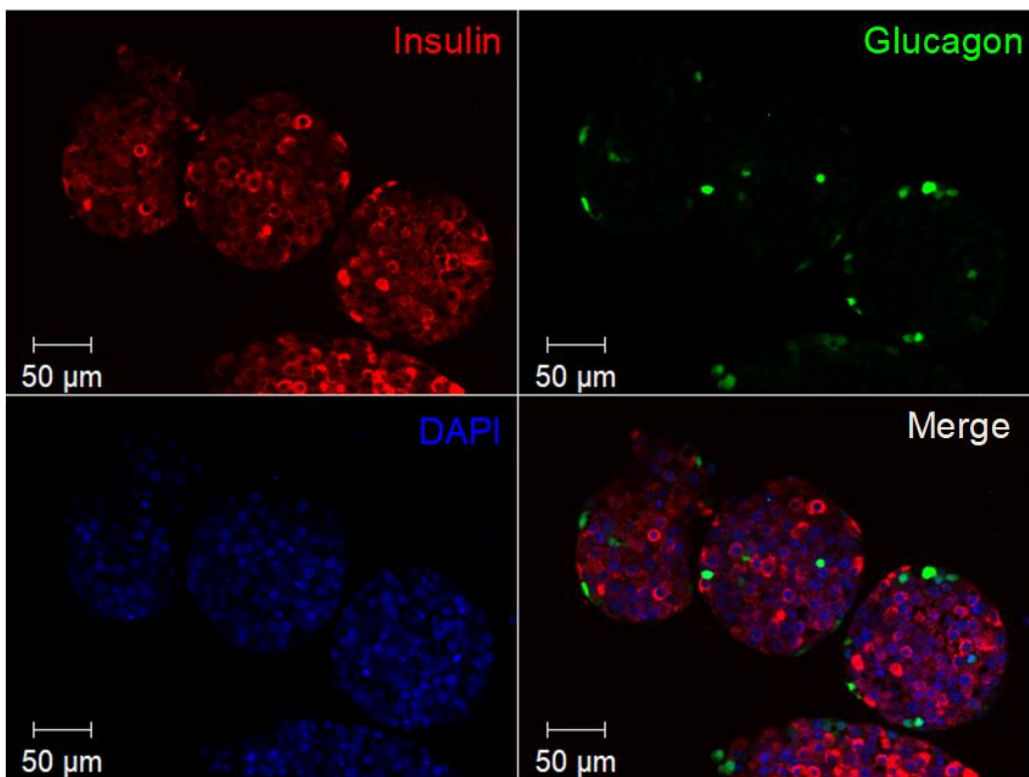

**Supplementary Figure S2. Primary 3D microtissues from mouse pancreatic islets (pseudo-islets).** (A) Mouse islets were digested and then reconstituted as 3D microtissues (pseudo-islets) using the hanging drop system (Gravity plates). Each well contained the same number of cells. (B) Using this culture system, the pseudoislets re-organize themselves as isolated primary islets. Pictures of representative pseudoislets from *Men1<sup>+/+</sup>* mice were taken at Day 5 under the light microscope (A) or after immunofluorescent stainings with the islet cell markers insulin and glucagon (B). Size bar: 400μm (A); 50μm (B).

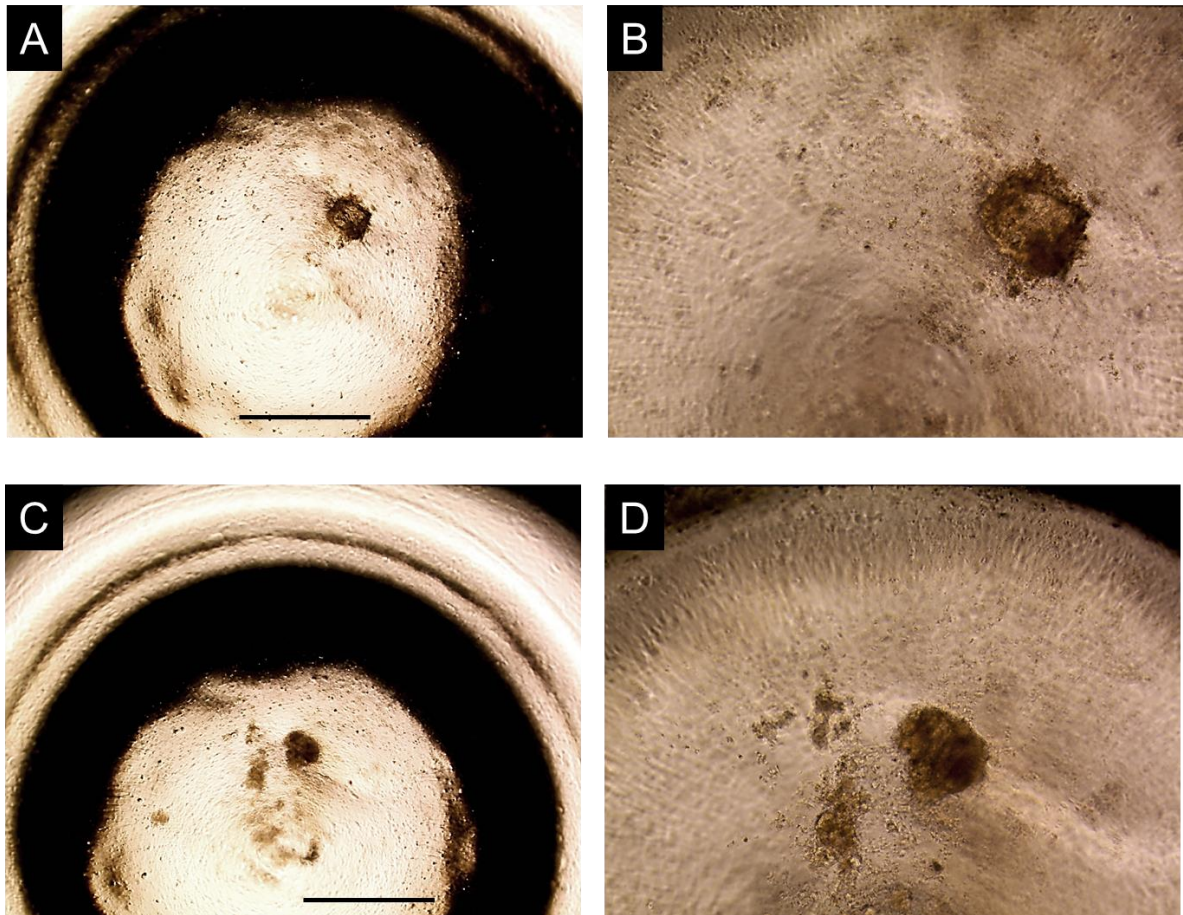

**Supplementary Figure S3. Representative primary human 3D tumoroids. (A,B)** Images of the PNET1 sample. Human tumor tissues were dissociated as reported in the Materials & Methods and the same number of cells was plated in ultra-low attachment plates. Brightfield pictures were taken using the EVOS system 7 day after treatment with DMSO vehicle (controls). **(C,D)** Images of the PNET2 sample. (A, C) Size bar: 400µm. Original magnification: 4X (A,C); 10X (B,D).

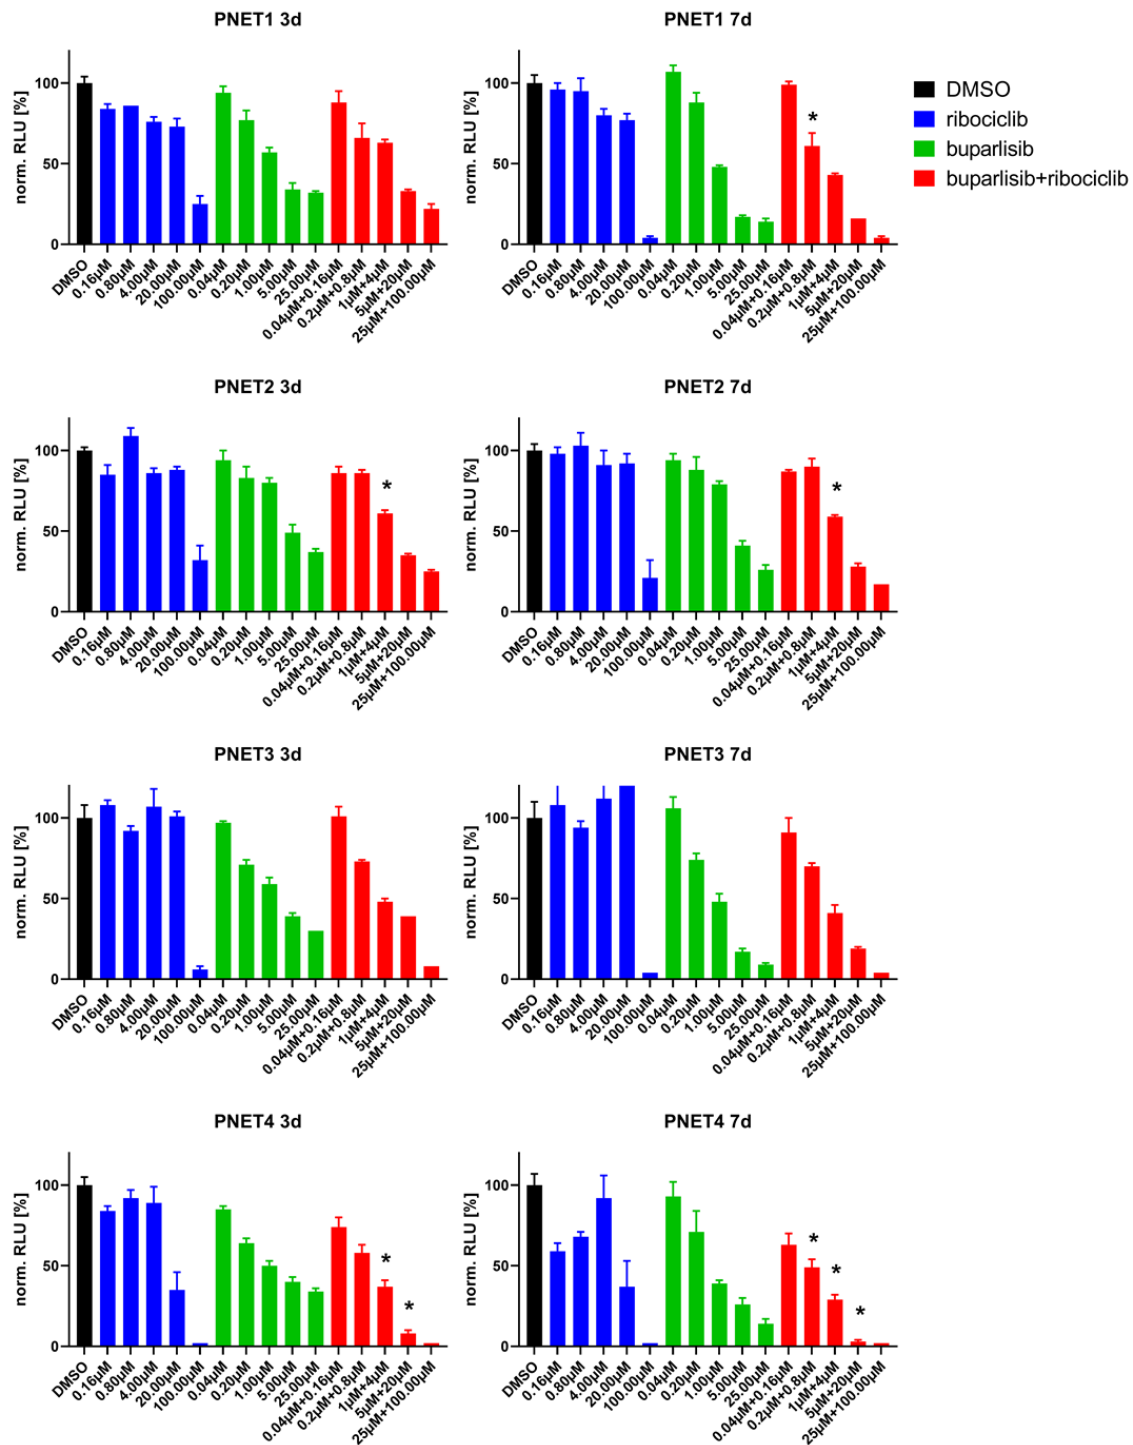

**Supplementary Figure S4. Effect of buparlisib, ribociclib and their combination on human-derived PanNET 3D tumoroids.** Cell viability of human tumoroids PNET1, PNET2, PNET3 and PNET4. Primary tumor cells were plated and after 5 days they were treated with the indicated concentrations of buparlisib or ribociclib alone or in combination for a total of 7 days. Here are shown the values for the 3-day time point (3d) and the 7-day (7d) time point. Data were first normalized per-well using a RTG baseline measurement for each individual well and then normalized to the average of the corresponding DMSO control of the respective day. Data represent means  $\pm$  SEM ( $n = 1$  per patient, three technical replicates). RLU, relative luminescence unit. \*, significant decrease in cell viability *versus* single treatments,  $P < 0.05$ .
